# Supplementary material for: Non-invasive vagus nerve stimulation conditions increased invigoration and wanting in depression
Source: bioRxiv or medRxiv preprint supplement (doi:10.1101/2023.09.28.23296284), 2023-09-29
Supplement: Supplementary file [file media-1.pdf]

## **Supporting Information**

### **Non-invasive vagus nerve stimulation conditions increased invigoration and wanting in depression**

Magdalena Ferstl<sup>1\*</sup>, Anne Kühnel<sup>2\*</sup>, Johannes Klaus<sup>1</sup>, Wy Ming Lin<sup>1,4</sup>,  
& Nils B. Kroemer<sup>1-3</sup>

<sup>1</sup> Department of Psychiatry and Psychotherapy, Tübingen Center for Mental Health, University of Tübingen, Tübingen, Germany

<sup>2</sup> Section of Medical Psychology, Department of Psychiatry and Psychotherapy, Faculty of Medicine, University of Bonn, Bonn, Germany

<sup>3</sup> German Center for Mental Health

<sup>4</sup> Hector Research Institute for Education Science and Psychology, University of Tübingen, Tübingen, Germany

\* Equal contribution

#### **Corresponding author\***

Prof. Dr. Nils B. Kroemer, [nkroemer@uni-bonn.de](mailto:nkroemer@uni-bonn.de)

Venusberg Campus 1, 53127 Bonn, Germany

## Figures

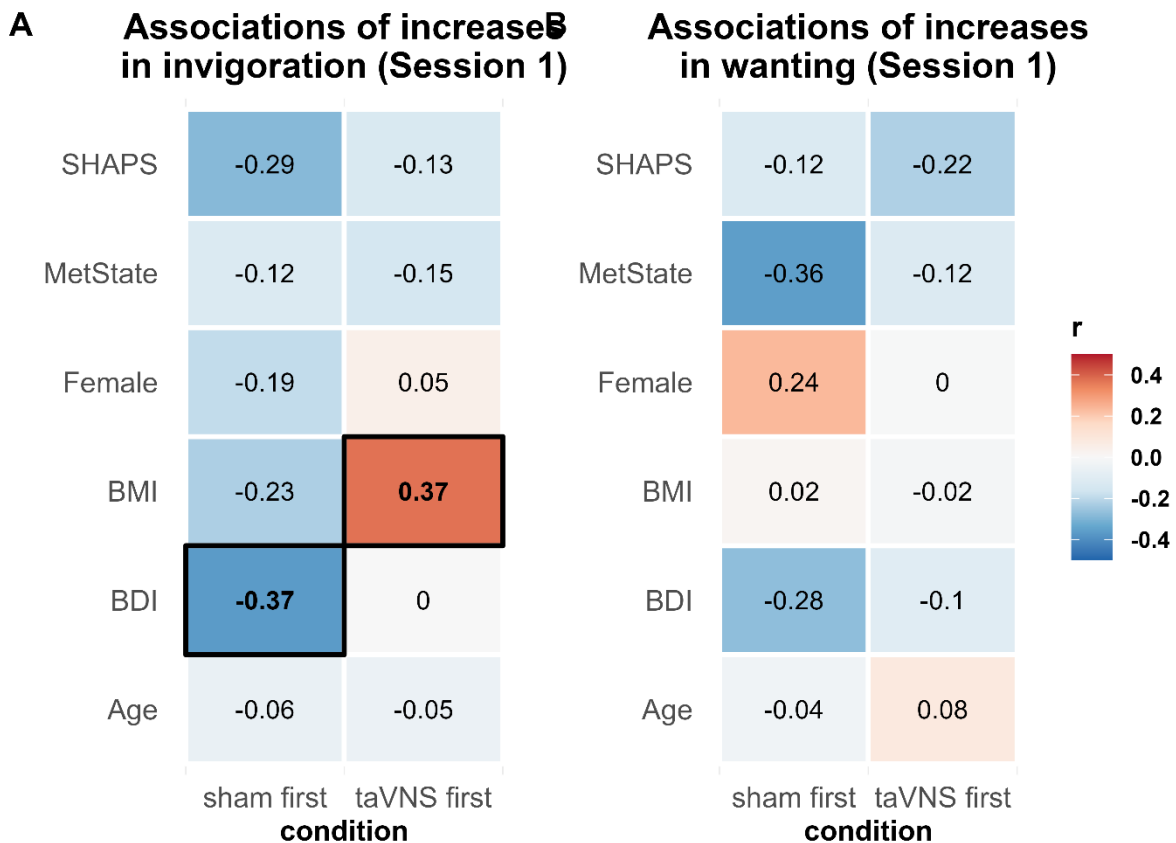

**Figure S1:** taVNS-induced trial-wise increases in invigoration during session 1 depend on BMI and reduce differences related to depressive symptoms. A) Correlations of trial-wise increased in invigoration during session 1 with baseline characteristics separated for sham and taVNS. In the sham condition, more depressive symptoms are associated with decreased in invigoration from trial-to-trial ( $r(28) = .37, p = .046$ ). In contrast, during taVNS symptom severity does not affect changes across trials ( $r(27) = .001, p = .99$ ). Moreover, taVNS induced increased are higher in participants with an increased BMI ( $r(27) = .37, p = .046$ ). SHAPS = Snaith Hamilton Pleasure Scale, BMI = Body mass index, BDI = Beck Depression Inventory, taVNS = transcutaneous vagus nerve stimulation.

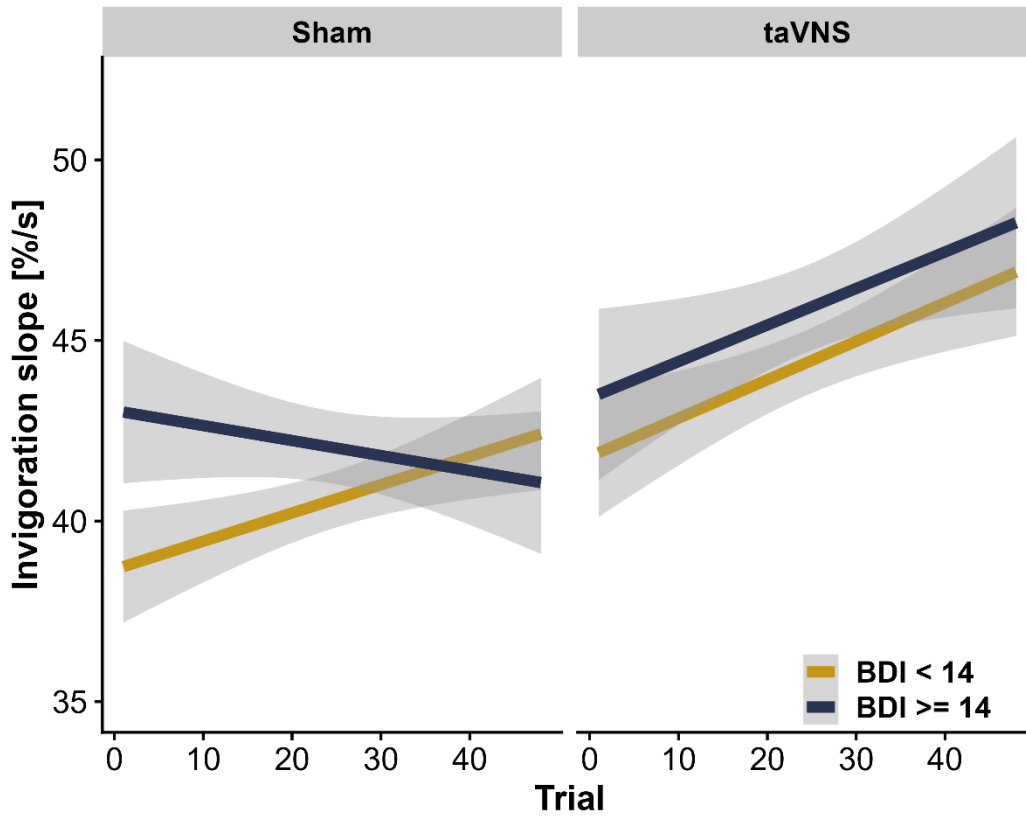

**Figure S2:** In Session 1, trial-wise increases in invigoration slope depend on depressive symptom severity (Beck Depression Inventory, BDI) in the sham condition ( $r(28) = .37, p = .046$ ), but not the transcutaneous auricular vagus nerve stimulation (taVNS) condition ( $r(27) = .001, p = .99$ ).

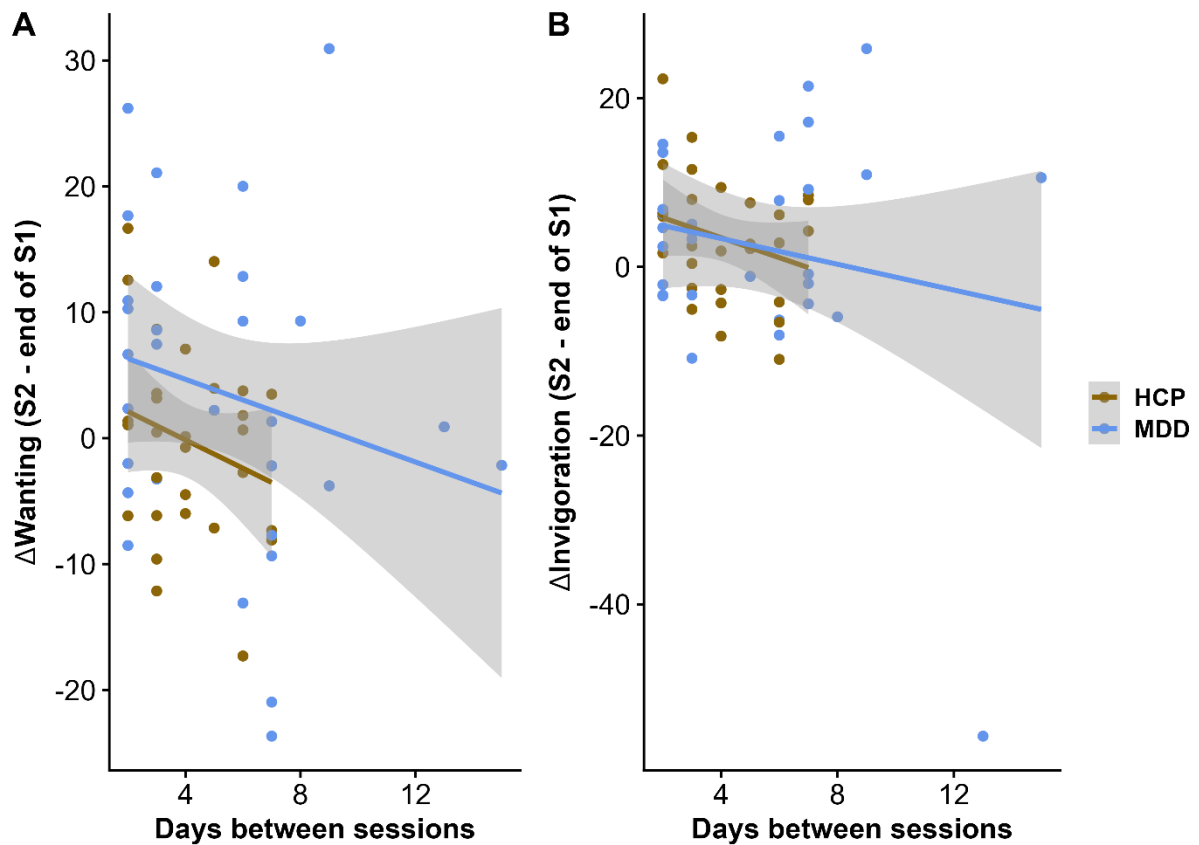

**Figure S3:** Carry over effects between session for wanting and invigoration depend on the number of days between session with stronger losses if sessions are further apart. A) Differences in wanting between the end of session 1 and session 2 are numerically more negative (i.e., any gains during session 1 are lost again) the further apart the sessions were completed ( $b = -2.6$ ,  $t(55) = -1.48$ ,  $p = 0.15$ ). B) Differences in invigoration between the end of session 1 and session 2 are numerically more negative (i.e., any gains during session 1 are lost again) the further apart the sessions were completed ( $b = -2.6$ ,  $t(55) = -1.37$ ,  $p = 0.17$ ).

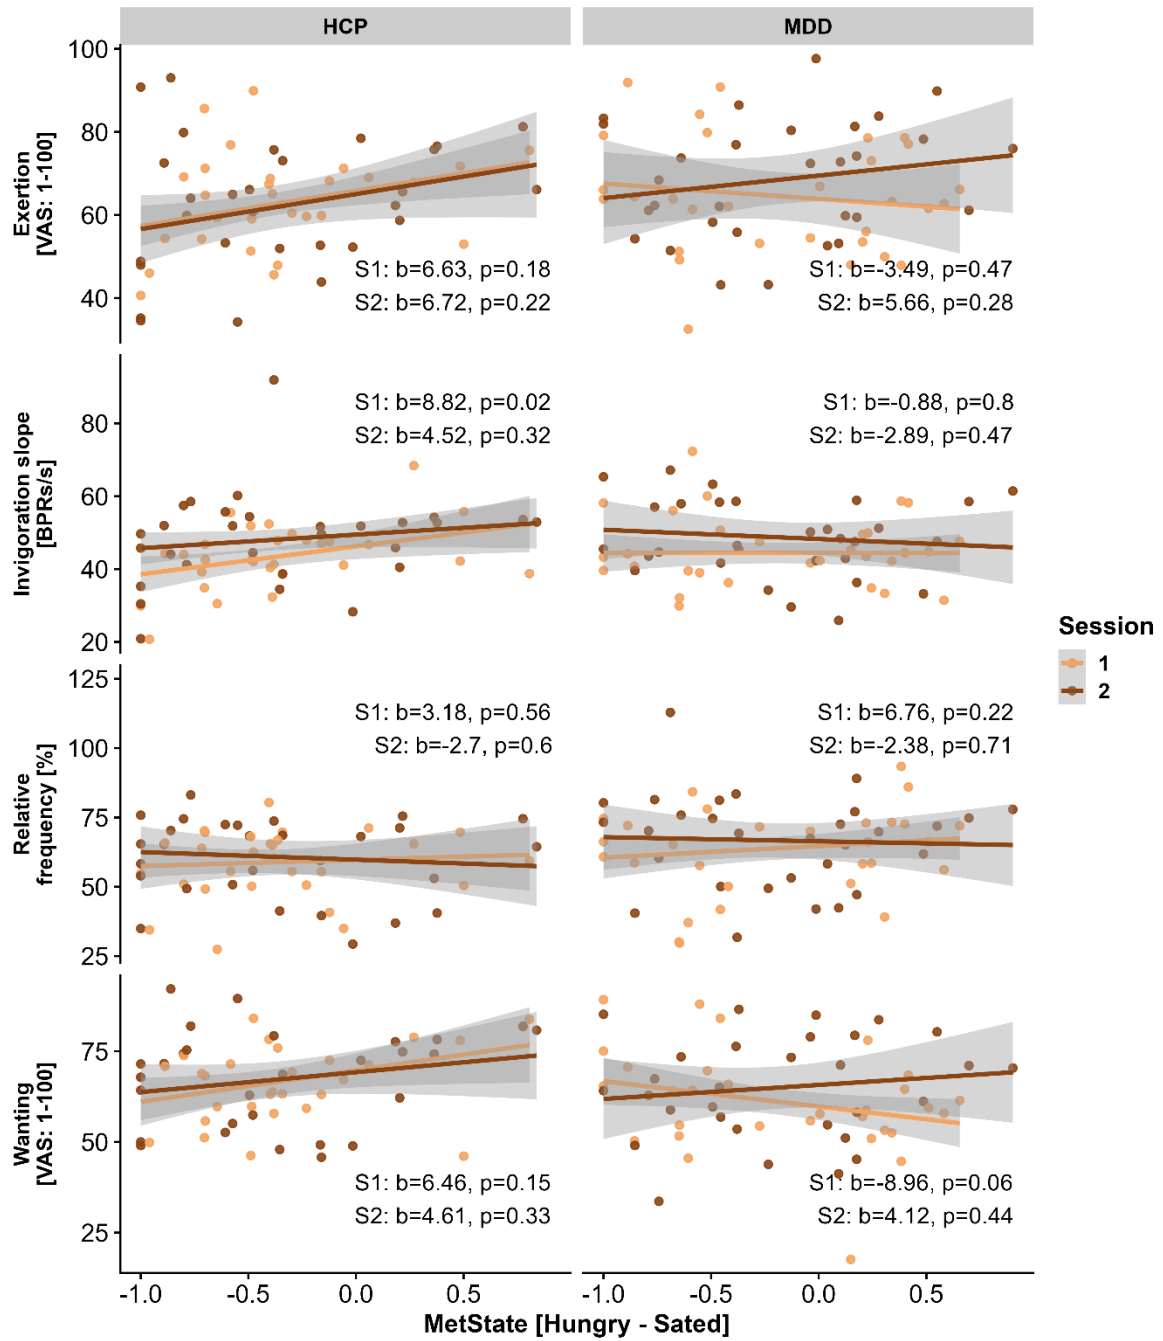

**Figure S4:** In healthy participants, motivation depends on the current metabolic state (Hungry – Sated) in session 1.

## Tables

| <i>Predictors</i>                                | Invigoration Slope |                  |           | Invigoration Slope |                  |           | Invigoration Slope |                  |           |
|--------------------------------------------------|--------------------|------------------|-----------|--------------------|------------------|-----------|--------------------|------------------|-----------|
|                                                  | <i>Estimates</i>   | <i>p</i>         | <i>df</i> | <i>Estimates</i>   | <i>p</i>         | <i>df</i> | <i>Estimates</i>   | <i>p</i>         | <i>df</i> |
| (Intercept)                                      | 34.6               | <b>&lt;0.001</b> | 49.0      | 35.5               | <b>&lt;0.001</b> | 37.4      | 35.6               | <b>&lt;0.001</b> | 37.1      |
| Stim [taVNS]                                     | 5.6                | <b>0.044</b>     | 56.7      | 5.7                | <b>0.042</b>     | 56.3      | 5.6                | <b>0.046</b>     | 55.1      |
| RewMag [High]                                    | 8.4                | <b>0.003</b>     | 29.3      | 8.4                | <b>0.003</b>     | 29.4      | 8.4                | <b>0.003</b>     | 29.3      |
| Diff [Hard]                                      | 0.5                | 0.728            | 39.1      | 0.5                | 0.728            | 39.2      | 0.5                | 0.727            | 39.1      |
| Money [Money]                                    | 4.7                | <b>0.001</b>     | 58.0      | 4.7                | <b>0.001</b>     | 58.0      | 4.7                | <b>0.001</b>     | 58.0      |
| Stim [taVNS] ×<br>RewMag [High]                  | -2.4               | 0.400            | 46.6      | -2.4               | 0.400            | 46.7      | -2.4               | 0.400            | 46.7      |
| Stim [taVNS] ×<br>Diff [Hard]                    | 1.0                | 0.648            | 94.4      | 1.0                | 0.648            | 94.2      | 1.0                | 0.644            | 92.8      |
| RewMag [High] ×<br>Diff [Hard]                   | -1.5               | 0.541            | 29.2      | -1.5               | 0.541            | 29.1      | -1.5               | 0.541            | 29.3      |
| Stim [taVNS] ×<br>RewMag [High] ×<br>Diff [Hard] | -0.6               | 0.853            | 65.4      | -0.6               | 0.853            | 65.2      | -0.6               | 0.853            | 62.6      |
| Group [MDD]                                      | 1.9                | 0.327            | 47.5      |                    |                  |           |                    |                  |           |
| BDI                                              |                    |                  |           | 1.5                | 0.111            | 44.2      |                    |                  |           |
| SHAPS                                            |                    |                  |           |                    |                  |           | 2.1                | <b>0.027</b>     | 47.0      |

**Table S3:** Invigoration slope does not differ between participants with major depressive disorder (MDD) and healthy control participants (HCP) in session 1. Results from a linear mixed effects model. BDI = Beck's Depression Inventory. SHAPS = Snaith Hamilton pleasure scale

| <i>Predictors</i>                                | <b>Invigoration Slope</b> |                  |           | <b>Invigoration Slope</b> |                  |           | <b>Invigoration Slope</b> |                  |           |
|--------------------------------------------------|---------------------------|------------------|-----------|---------------------------|------------------|-----------|---------------------------|------------------|-----------|
|                                                  | <i>Estimates</i>          | <i>p</i>         | <i>df</i> | <i>Estimates</i>          | <i>p</i>         | <i>df</i> | <i>Estimates</i>          | <i>p</i>         | <i>df</i> |
| (Intercept)                                      | 43.2                      | <b>&lt;0.001</b> | 41.4      | 44.3                      | <b>&lt;0.001</b> | 31.5      | 44.2                      | <b>&lt;0.001</b> | 31.3      |
| Stim [taVNS]                                     | -6.2                      | 0.067            | 54.6      | -6.5                      | 0.060            | 53.7      | -6.2                      | 0.067            | 55.2      |
| RewMag [High]                                    | 7.7                       | <b>&lt;0.001</b> | 29.5      | 7.7                       | <b>&lt;0.001</b> | 29.3      | 7.7                       | <b>&lt;0.001</b> | 29.8      |
| Diff [Hard]                                      | 1.7                       | 0.328            | 46.9      | 1.7                       | 0.327            | 46.5      | 1.7                       | 0.324            | 46.7      |
| Money [Money]                                    | 5.8                       | <b>&lt;0.001</b> | 58.1      | 5.8                       | <b>&lt;0.001</b> | 58.1      | 5.8                       | <b>&lt;0.001</b> | 58.1      |
| Stim [taVNS] ×<br>RewMag [High]                  | 1.3                       | 0.713            | 50.5      | 1.3                       | 0.713            | 50.4      | 1.3                       | 0.713            | 50.6      |
| Stim [taVNS] × Diff<br>[Hard]                    | -2.4                      | 0.295            | 107.5     | -2.4                      | 0.294            | 107.1     | -2.4                      | 0.293            | 108.0     |
| RewMag [High] ×<br>Diff [Hard]                   | -0.7                      | 0.747            | 30.9      | -0.7                      | 0.746            | 30.1      | -0.7                      | 0.747            | 31.9      |
| Stim [taVNS] ×<br>RewMag [High] ×<br>Diff [Hard] | 1.7                       | 0.583            | 80.3      | 1.7                       | 0.584            | 79.2      | 1.7                       | 0.583            | 82.0      |
| Group [MDD]                                      | 1.8                       | 0.487            | 52.1      |                           |                  |           |                           |                  |           |
| BDI                                              |                           |                  |           | 2.3                       | 0.080            | 48.2      |                           |                  |           |
| SHAPS                                            |                           |                  |           |                           |                  |           | 1.5                       | 0.272            | 52.1      |

**Table S4:** Invigoration slope does not differ between participants with major depressive disorder (MDD) and healthy control participants (HCP) in session 2. Results from a linear mixed effects model. BDI = Beck's Depression Inventory. SHAPS = Snaith Hamilton pleasure scale.

| <i>Predictors</i>                                | <b>Effort maintenance</b> |                  |           | <b>Effort maintenance</b> |                  |           | <b>Effort maintenance</b> |                  |           |
|--------------------------------------------------|---------------------------|------------------|-----------|---------------------------|------------------|-----------|---------------------------|------------------|-----------|
|                                                  | <i>Estimates</i>          | <i>p</i>         | <i>df</i> | <i>Estimates</i>          | <i>p</i>         | <i>df</i> | <i>Estimates</i>          | <i>p</i>         | <i>df</i> |
| (Intercept)                                      | 52.6                      | <b>&lt;0.001</b> | 49.7      | 54.1                      | <b>&lt;0.001</b> | 38.3      | 54.2                      | <b>&lt;0.001</b> | 38.3      |
| Stim [taVNS]                                     | 3.0                       | 0.469            | 56.5      | 3.1                       | 0.453            | 56.2      | 2.8                       | 0.495            | 56.2      |
| RewMag [High]                                    | 11.8                      | <b>0.001</b>     | 30.5      | 11.8                      | <b>0.001</b>     | 30.5      | 11.8                      | <b>0.001</b>     | 30.5      |
| Diff [Hard]                                      | -10.3                     | <b>&lt;0.001</b> | 29.2      | -10.3                     | <b>&lt;0.001</b> | 29.3      | -10.3                     | <b>&lt;0.001</b> | 29.2      |
| Money [Money]                                    | 7.7                       | <b>&lt;0.001</b> | 58.0      | 7.7                       | <b>&lt;0.001</b> | 58.0      | 7.7                       | <b>&lt;0.001</b> | 58.0      |
| Stim [taVNS] ×<br>RewMag [High]                  | -4.2                      | 0.217            | 43.6      | -4.2                      | 0.217            | 43.5      | -4.2                      | 0.217            | 43.5      |
| Stim [taVNS] × Diff<br>[Hard]                    | 1.4                       | 0.675            | 55.5      | 1.4                       | 0.675            | 55.5      | 1.4                       | 0.675            | 55.5      |
| RewMag [High] ×<br>Diff [Hard]                   | 2.8                       | <b>0.032</b>     | 91.8      | 2.8                       | <b>0.033</b>     | 87.2      | 2.8                       | <b>0.031</b>     | 94.2      |
| Stim [taVNS] ×<br>RewMag [High] ×<br>Diff [Hard] | 1.8                       | 0.435            | 53.2      | 1.8                       | 0.436            | 53.3      | 1.8                       | 0.435            | 53.1      |
| Group [MDD]                                      | 3.1                       | 0.326            | 51.8      |                           |                  |           |                           |                  |           |
| BDI                                              |                           |                  |           | 2.0                       | 0.207            | 48.7      |                           |                  |           |
| SHAPS                                            |                           |                  |           |                           |                  |           | 0.1                       | 0.951            | 53.9      |

**Table S7:** Effort maintenance (RelEffort) does not differ between participants with major depressive disorder (MDD) compared to healthy control participants (HCP) in session 1. Results from a linear mixed-effects model. BDI = Beck's Depression Inventory. SHAPS = Snaith Hamilton pleasure scale



| <i>Predictors</i>                                | <b>Effort maintenance</b> |                  |           | <b>Effort maintenance</b> |                  |           | <b>Effort maintenance</b> |                  |           |
|--------------------------------------------------|---------------------------|------------------|-----------|---------------------------|------------------|-----------|---------------------------|------------------|-----------|
|                                                  | <i>Estimates</i>          | <i>p</i>         | <i>df</i> | <i>Estimates</i>          | <i>p</i>         | <i>df</i> | <i>Estimates</i>          | <i>p</i>         | <i>df</i> |
| (Intercept)                                      | 56.2                      | <b>&lt;0.001</b> | 39.8      | 58.6                      | <b>&lt;0.001</b> | 32.7      | 58.4                      | <b>&lt;0.001</b> | 32.6      |
| Stim [taVNS]                                     | -1.1                      | 0.820            | 56.2      | -1.3                      | 0.783            | 56.0      | -0.9                      | 0.853            | 55.8      |
| RewMag [High]                                    | 9.1                       | <b>0.001</b>     | 28.0      | 9.1                       | <b>0.001</b>     | 28.0      | 9.1                       | <b>0.001</b>     | 28.1      |
| Diff [Hard]                                      | -6.9                      | <b>0.006</b>     | 28.5      | -6.9                      | <b>0.006</b>     | 28.5      | -6.9                      | <b>0.006</b>     | 28.5      |
| Money [Money]                                    | 7.9                       | <b>&lt;0.001</b> | 58.0      | 7.9                       | <b>&lt;0.001</b> | 58.0      | 7.9                       | <b>&lt;0.001</b> | 58.0      |
| Stim [taVNS] ×<br>RewMag [High]                  | 3.1                       | 0.449            | 54.7      | 3.1                       | 0.449            | 54.7      | 3.1                       | 0.449            | 54.7      |
| Stim [taVNS] × Diff<br>[Hard]                    | -5.8                      | 0.095            | 56.7      | -5.8                      | 0.095            | 56.7      | -5.8                      | 0.095            | 56.7      |
| RewMag [High] ×<br>Diff [Hard]                   | 4.0                       | <b>0.029</b>     | 28.4      | 4.0                       | <b>0.029</b>     | 28.4      | 4.0                       | <b>0.029</b>     | 28.4      |
| Stim [taVNS] ×<br>RewMag [High] ×<br>Diff [Hard] | 1.2                       | 0.595            | 54.5      | 1.2                       | 0.595            | 54.5      | 1.2                       | 0.595            | 54.5      |
| Group [MDD]                                      | 4.5                       | 0.145            | 44.5      |                           |                  |           |                           |                  |           |
| BDI                                              |                           |                  |           | 3.1                       | <b>0.039</b>     | 41.6      |                           |                  |           |
| SHAPS                                            |                           |                  |           |                           |                  |           | 1.3                       | 0.398            | 45.4      |

**Table S8:** Effort maintenance (RelEffort) does not differ between participants with major depressive disorder (MDD) compared to healthy control participants (HCP) in session 2. Results from a linear mixed-effects model. BDI = Beck's Depression Inventory. SHAPS = Snaith Hamilton pleasure scale

| <i>Predictors</i>                                | <b>Wanting</b>   |                  |           | <b>Wanting</b>   |                  |           | <b>Wanting</b>   |                  |           |
|--------------------------------------------------|------------------|------------------|-----------|------------------|------------------|-----------|------------------|------------------|-----------|
|                                                  | <i>Estimates</i> | <i>p</i>         | <i>df</i> | <i>Estimates</i> | <i>p</i>         | <i>df</i> | <i>Estimates</i> | <i>p</i>         | <i>df</i> |
| (Intercept)                                      | 50.8             | <b>&lt;0.001</b> | 44.1      | 47.1             | <b>&lt;0.001</b> | 34.3      | 47.0             | <b>&lt;0.001</b> | 34.2      |
| Stim [taVNS]                                     | 3.9              | 0.358            | 51.5      | 4.1              | 0.344            | 50.8      | 4.2              | 0.330            | 52.2      |
| RewMag [High]                                    | 22.0             | <b>&lt;0.001</b> | 31.6      | 22.0             | <b>&lt;0.001</b> | 31.6      | 22.0             | <b>&lt;0.001</b> | 31.6      |
| Diff [Hard]                                      | -10.1            | <b>&lt;0.001</b> | 28.9      | -10.1            | <b>&lt;0.001</b> | 29.1      | -10.1            | <b>&lt;0.001</b> | 29.0      |
| Money [Money]                                    | 15.9             | <b>&lt;0.001</b> | 58.0      | 15.9             | <b>&lt;0.001</b> | 58.0      | 15.9             | <b>&lt;0.001</b> | 58.0      |
| Stim [taVNS] ×<br>RewMag [High]                  | -5.9             | 0.172            | 47.8      | -5.9             | 0.172            | 47.8      | -5.9             | 0.172            | 47.8      |
| Stim [taVNS] ×<br>Diff [Hard]                    | 3.6              | 0.256            | 51.0      | 3.6              | 0.255            | 51.2      | 3.6              | 0.256            | 51.1      |
| RewMag [High] ×<br>Diff [Hard]                   | 4.6              | <b>0.048</b>     | 29.2      | 4.6              | <b>0.048</b>     | 29.3      | 4.6              | <b>0.048</b>     | 29.2      |
| Stim [taVNS] ×<br>RewMag [High] ×<br>Diff [Hard] | 0.5              | 0.863            | 61.4      | 0.5              | 0.863            | 61.7      | 0.5              | 0.863            | 61.5      |
| Group [MDD]                                      | -7.1             | <b>0.017</b>     | 55.4      |                  |                  |           |                  |                  |           |
| BDI                                              |                  |                  |           | -1.3             | 0.402            | 55.4      |                  |                  |           |
| SHAPS                                            |                  |                  |           |                  |                  |           | -2.1             | 0.174            | 56.0      |

**Table S5:** Wanting is lower in participants with major depressive disorder (MDD) compared to healthy control participants (HCP) in session 1. Results from a linear mixed effects model. BDI = Beck's Depression Inventory. SHAPS = Snaith Hamilton pleasure scale

| <i>Predictors</i>                                | <b>Wanting</b>   |                  |           | <b>Wanting</b>   |                  |           | <b>Wanting</b>   |                  |           |
|--------------------------------------------------|------------------|------------------|-----------|------------------|------------------|-----------|------------------|------------------|-----------|
|                                                  | <i>Estimates</i> | <i>p</i>         | <i>df</i> | <i>Estimates</i> | <i>p</i>         | <i>df</i> | <i>Estimates</i> | <i>p</i>         | <i>df</i> |
| (Intercept)                                      | 53.8             | <b>&lt;0.001</b> | 43.6      | 52.7             | <b>&lt;0.001</b> | 35.1      | 52.6             | <b>&lt;0.001</b> | 35.1      |
| Stim [taVNS]                                     | -6.2             | 0.182            | 54.3      | -6.5             | 0.171            | 55.2      | -6.4             | 0.175            | 55.0      |
| RewMag [High]                                    | 20.1             | <b>&lt;0.001</b> | 28.9      | 20.1             | <b>&lt;0.001</b> | 28.9      | 20.1             | <b>&lt;0.001</b> | 28.9      |
| Diff [Hard]                                      | -5.0             | <b>0.001</b>     | 29.0      | -5.0             | <b>0.001</b>     | 28.9      | -5.0             | <b>0.001</b>     | 29.0      |
| Money [Money]                                    | 14.7             | <b>&lt;0.001</b> | 58.0      | 14.7             | <b>&lt;0.001</b> | 58.0      | 14.7             | <b>&lt;0.001</b> | 58.0      |
| Stim [taVNS] ×<br>RewMag [High]                  | 6.9              | 0.116            | 56.0      | 6.8              | 0.116            | 56.1      | 6.9              | 0.116            | 56.0      |
| Stim [taVNS] ×<br>Diff [Hard]                    | -3.4             | 0.128            | 57.9      | -3.4             | 0.128            | 57.9      | -3.4             | 0.128            | 57.9      |
| RewMag [High] ×<br>Diff [Hard]                   | 2.6              | 0.116            | 56.2      | 2.6              | 0.117            | 55.7      | 2.6              | 0.116            | 56.0      |
| Stim [taVNS] ×<br>RewMag [High] ×<br>Diff [Hard] | 1.4              | 0.530            | 116.7     | 1.4              | 0.530            | 116.5     | 1.4              | 0.530            | 116.6     |
| Group [MDD]                                      | -2.4             | 0.415            | 55.5      |                  |                  |           |                  |                  |           |
| BDI                                              |                  |                  |           | 0.4              | 0.801            | 55.4      |                  |                  |           |
| SHAPS                                            |                  |                  |           |                  |                  |           | -0.9             | 0.543            | 56.4      |

**Table S6:** Wanting does not differ between participants with major depressive disorder (MDD) compared to healthy control participants (HCP) in session 2. Results from a linear mixed effects model. BDI = Beck's Depression Inventory. SHAPS = Snaith Hamilton pleasure scale

| <i>Predictors</i>                                | <b>Exertion [Group]</b> |                  |           | <b>Exertion [BDI]</b> |                  |           | <b>Exertion [SHAPS]</b> |                  |           |
|--------------------------------------------------|-------------------------|------------------|-----------|-----------------------|------------------|-----------|-------------------------|------------------|-----------|
|                                                  | <i>Estimates</i>        | <i>p</i>         | <i>df</i> | <i>Estimates</i>      | <i>p</i>         | <i>df</i> | <i>Estimates</i>        | <i>p</i>         | <i>df</i> |
| (Intercept)                                      | 54.6                    | <b>&lt;0.001</b> | 42.5      | 55.1                  | <b>&lt;0.001</b> | 34.6      | 55.0                    | <b>&lt;0.001</b> | 34.2      |
| Stim [taVNS]                                     | 0.2                     | 0.961            | 45.5      | 0.2                   | 0.970            | 45.5      | 0.2                     | 0.956            | 44.5      |
| RewMag [High]                                    | 17.8                    | <b>&lt;0.001</b> | 29.2      | 17.8                  | <b>&lt;0.001</b> | 29.2      | 17.8                    | <b>&lt;0.001</b> | 29.1      |
| Diff [Hard]                                      | -12.1                   | <b>&lt;0.001</b> | 29.3      | -12.1                 | <b>&lt;0.001</b> | 29.3      | -12.1                   | <b>&lt;0.001</b> | 29.3      |
| Money [Money]                                    | 10.7                    | <b>&lt;0.001</b> | 58.0      | 10.7                  | <b>&lt;0.001</b> | 58.0      | 10.7                    | <b>&lt;0.001</b> | 57.9      |
| Stim [taVNS] ×<br>RewMag [High]                  | -6.2                    | 0.175            | 45.2      | -6.2                  | 0.175            | 45.2      | -6.2                    | 0.175            | 45.1      |
| Stim [taVNS] ×<br>Diff [Hard]                    | 1.9                     | 0.628            | 56.4      | 1.9                   | 0.628            | 56.4      | 1.9                     | 0.628            | 56.4      |
| RewMag [High] ×<br>Diff [Hard]                   | 5.7                     | 0.059            | 29.1      | 5.7                   | 0.059            | 29.1      | 5.7                     | 0.059            | 29.1      |
| Stim [taVNS] ×<br>RewMag [High] ×<br>Diff [Hard] | 0.9                     | 0.813            | 56.2      | 0.9                   | 0.813            | 56.2      | 0.9                     | 0.813            | 56.1      |
| Group [MDD]                                      | 0.9                     | 0.755            | 55.6      |                       |                  |           |                         |                  |           |
| BDI                                              |                         |                  |           | 0.0                   | 0.999            | 55.9      |                         |                  |           |
| SHAPS                                            |                         |                  |           |                       |                  |           | 1.5                     | 0.286            | 53.4      |

**Table S7:** Self-rated exertion does not differ between participants with major depressive disorder (MDD) compared to healthy control participants (HCP) in session 1. Results from a linear mixed-effects model. BDI = Beck's Depression Inventory. SHAPS = Snaith Hamilton pleasure scale

| <i>Predictors</i>                                | <b>Exertion [Group]</b> |                  |           | <b>Exertion [BDI]</b> |                  |           | <b>Exertion [SHAPS]</b> |                  |           |
|--------------------------------------------------|-------------------------|------------------|-----------|-----------------------|------------------|-----------|-------------------------|------------------|-----------|
|                                                  | <i>Estimates</i>        | <i>p</i>         | <i>df</i> | <i>Estimates</i>      | <i>p</i>         | <i>df</i> | <i>Estimates</i>        | <i>p</i>         | <i>df</i> |
| (Intercept)                                      | 53.0                    | <b>&lt;0.001</b> | 43.0      | 54.3                  | <b>&lt;0.001</b> | 35.1      | 54.2                    | <b>&lt;0.001</b> | 34.2      |
| Stim [taVNS]                                     | 1.0                     | 0.833            | 55.9      | 0.8                   | 0.854            | 56.2      | 1.0                     | 0.828            | 55.9      |
| RewMag [High]                                    | 14.6                    | <b>&lt;0.001</b> | 28.1      | 14.6                  | <b>&lt;0.001</b> | 28.2      | 14.6                    | <b>&lt;0.001</b> | 28.2      |
| Diff [Hard]                                      | -5.1                    | <b>0.027</b>     | 28.0      | -5.1                  | <b>0.027</b>     | 28.0      | -5.1                    | <b>0.027</b>     | 28.0      |
| Money [Money]                                    | 11.0                    | <b>&lt;0.001</b> | 58.0      | 11.0                  | <b>&lt;0.001</b> | 58.0      | 11.0                    | <b>&lt;0.001</b> | 58.0      |
| Stim [taVNS] ×<br>RewMag [High]                  | 6.1                     | 0.207            | 52.6      | 6.1                   | 0.207            | 52.6      | 6.1                     | 0.207            | 52.6      |
| Stim [taVNS] ×<br>Diff [Hard]                    | -7.5                    | 0.056            | 51.5      | -7.5                  | 0.056            | 51.5      | -7.5                    | 0.056            | 51.5      |
| RewMag [High] ×<br>Diff [Hard]                   | 3.0                     | 0.161            | 28.0      | 3.0                   | 0.161            | 28.5      | 3.0                     | 0.161            | 28.2      |
| Stim [taVNS] ×<br>RewMag [High] ×<br>Diff [Hard] | 2.9                     | 0.319            | 56.8      | 2.9                   | 0.319            | 57.5      | 2.9                     | 0.319            | 57.1      |
| Group [MDD]                                      | 2.4                     | 0.410            | 54.4      |                       |                  |           |                         |                  |           |
| BDI                                              |                         |                  |           | 1.6                   | 0.255            | 53.5      |                         |                  |           |
| SHAPS                                            |                         |                  |           |                       |                  |           | 1.9                     | 0.202            | 55.9      |

**Table S8:** Self-rated exertion does not differ between participants with major depressive disorder (MDD) compared to healthy control participants (HCP) in session 2. Results from a linear mixed-effects model. BDI = Beck's Depression Inventory. SHAPS = Snaith Hamilton pleasure scale

| <i>Predictors</i>                                        | <b>Invigoration [Group]</b> |                  |           | <b>Invigoration[BDI]</b> |                  |           | <b>Invigoration [SHAPS]</b> |                  |           |
|----------------------------------------------------------|-----------------------------|------------------|-----------|--------------------------|------------------|-----------|-----------------------------|------------------|-----------|
|                                                          | <i>Estimates</i>            | <i>p</i>         | <i>df</i> | <i>Estimates</i>         | <i>p</i>         | <i>df</i> | <i>Estimates</i>            | <i>p</i>         | <i>df</i> |
| (Intercept)                                              | 34.5                        | <b>&lt;0.001</b> | 103.2     | 34.0                     | <b>&lt;0.001</b> | 101.7     | 34.0                        | <b>&lt;0.001</b> | 100.5     |
| Stim [taVNS]                                             | 0.0                         | 0.989            | 64.8      | -0.2                     | 0.884            | 64.7      | -0.2                        | 0.884            | 64.8      |
| RewMag [High]                                            | 6.2                         | <b>0.008</b>     | 59.5      | 8.1                      | <b>&lt;0.001</b> | 59.0      | 8.1                         | <b>&lt;0.001</b> | 58.8      |
| Diff [Hard]                                              | 1.7                         | 0.319            | 80.0      | 1.1                      | 0.353            | 78.0      | 1.1                         | 0.352            | 80.5      |
| Session                                                  | 4.0                         | <b>&lt;0.001</b> | 58.4      | 3.9                      | <b>&lt;0.001</b> | 58.8      | 3.8                         | <b>&lt;0.001</b> | 60.7      |
| Money [Money]                                            | 5.2                         | <b>&lt;0.001</b> | 58.0      | 5.2                      | <b>&lt;0.001</b> | 58.0      | 5.2                         | <b>&lt;0.001</b> | 58.0      |
| Stim [taVNS] ×<br>RewMag[High]                           | -2.0                        | 0.356            | 95.0      | -0.6                     | 0.702            | 92.7      | -0.6                        | 0.705            | 93.0      |
| Stim [taVNS] ×<br>Diff [Hard]                            | -2.4                        | 0.246            | 168.9     | -0.7                     | 0.617            | 142.5     | -0.7                        | 0.616            | 146.5     |
| RewMag [High] ×<br>Diff [Hard]                           | -0.5                        | 0.836            | 68.2      | -1.1                     | 0.515            | 68.9      | -1.1                        | 0.522            | 67.7      |
| Stim [taVNS] ×<br>RewMag [High] ×<br>Diff [Hard]         | 1.5                         | 0.601            | 259.1     | 0.7                      | 0.711            | 233.0     | 0.7                         | 0.714            | 200.3     |
| Group [MDD]                                              | -1.3                        | 0.673            | 57.3      |                          |                  |           |                             |                  |           |
| Stim [taVNS] ×<br>MDD                                    | -0.4                        | 0.871            | 64.9      |                          |                  |           |                             |                  |           |
| RewMag [High] ×<br>MDD                                   | 3.7                         | 0.252            | 59.0      |                          |                  |           |                             |                  |           |
| Diff [Hard] × MDD                                        | -1.1                        | 0.625            | 80.0      |                          |                  |           |                             |                  |           |
| taVNS × RewMag<br>[High] × MDD                           | 2.8                         | 0.357            | 94.8      |                          |                  |           |                             |                  |           |
| taVNS × Diff<br>[Hard] × MDD                             | 3.3                         | 0.254            | 174.6     |                          |                  |           |                             |                  |           |
| RewMag [High] ×<br>Diff [Hard] × MDD                     | -1.2                        | 0.736            | 68.2      |                          |                  |           |                             |                  |           |
| taVNS×RewMag<br>[High] × Diff<br>[Hard]) ×Group<br>[MDD] | -1.5                        | 0.713            | 264.6     |                          |                  |           |                             |                  |           |
| BDI                                                      |                             |                  |           | -0.2                     | 0.908            | 57.3      |                             |                  |           |
| Stim [taVNS] ×<br>BDI                                    |                             |                  |           | -0.5                     | 0.739            | 64.8      |                             |                  |           |

| <i>Predictors</i>                           | <b>Invigoration [Group]</b> |          |           | <b>Invigoration[BDI]</b> |          |           | <b>Invigoration [SHAPS]</b> |          |           |
|---------------------------------------------|-----------------------------|----------|-----------|--------------------------|----------|-----------|-----------------------------|----------|-----------|
|                                             | <i>Estimates</i>            | <i>p</i> | <i>df</i> | <i>Estimates</i>         | <i>p</i> | <i>df</i> | <i>Estimates</i>            | <i>p</i> | <i>df</i> |
| RewMag [High] × BDI                         |                             |          |           | 2.8                      | 0.080    | 59.1      |                             |          |           |
| Diff [Hard] × BDI                           |                             |          |           | 0.5                      | 0.653    | 79.2      |                             |          |           |
| taVNS × RewMag [High] × BDI                 |                             |          |           | 1.2                      | 0.427    | 93.5      |                             |          |           |
| taVNS × Diff [Hard] × BDI                   |                             |          |           | 0.6                      | 0.705    | 164.8     |                             |          |           |
| RewMag [High] × Diff [Hard] × BDI           |                             |          |           | -2.5                     | 0.131    | 68.8      |                             |          |           |
| taVNS × RewMag [High] × Diff [Hard] × BDI   |                             |          |           | -0.7                     | 0.734    | 253.1     |                             |          |           |
| SHAPS                                       |                             |          |           |                          |          |           | -0.6                        | 0.673    | 57.4      |
| Stim [taVNS] × SHAPS                        |                             |          |           |                          |          |           | 0.9                         | 0.519    | 64.8      |
| RewMag [High] × SHAPS                       |                             |          |           |                          |          |           | 1.2                         | 0.443    | 58.9      |
| Diff [Hard] × SHAPS                         |                             |          |           |                          |          |           | 1.1                         | 0.353    | 82.0      |
| taVNS × RewMag [High] × SHAPS               |                             |          |           |                          |          |           | 2.0                         | 0.209    | 94.0      |
| taVNS × Diff [Hard] × SHAPS                 |                             |          |           |                          |          |           | 1.3                         | 0.388    | 169.5     |
| RewMag [High] × Diff [Hard] × SHAPS         |                             |          |           |                          |          |           | -1.1                        | 0.516    | 67.7      |
| taVNS × RewMag [High] × Diff [Hard] × SHAPS |                             |          |           |                          |          |           | -1.9                        | 0.342    | 212.8     |

**Table S9:** Invigoration slope is not altered by transcutaneous vagus nerve stimulation (taVNS) across both sessions and independent of group. Results from a linear mixed effects models. BDI = Beck's Depression Inventory. SHAPS = Snaith Hamilton pleasure scale

| <i>Predictors</i>                                                 | <b>Effort maintenance [Group]</b> |                  |           | <b>Effort maintenance [SHAPS]</b> |                  |           | <b>Effort maintenance [BDI]</b> |                  |           |
|-------------------------------------------------------------------|-----------------------------------|------------------|-----------|-----------------------------------|------------------|-----------|---------------------------------|------------------|-----------|
|                                                                   | <i>Estimates</i>                  | <i>p</i>         | <i>df</i> | <i>Estimates</i>                  | <i>p</i>         | <i>df</i> | <i>Estimates</i>                | <i>p</i>         | <i>df</i> |
| (Intercept)                                                       | 49.4                              | <b>&lt;0.001</b> | 79.4      | 58.9                              | <b>&lt;0.001</b> | 59.7      | 60.0                            | <b>&lt;0.001</b> | 59.8      |
| Stim [taVNS]                                                      | 1.3                               | 0.598            | 56.8      | 0.8                               | 0.647            | 56.8      | 0.8                             | 0.648            | 56.8      |
| RewMag High]                                                      | 9.5                               | <b>0.002</b>     | 58.1      | 10.6                              | <b>&lt;0.001</b> | 57.2      | 10.6                            | <b>&lt;0.001</b> | 57.2      |
| Diff [Hard]                                                       | -9.2                              | <b>&lt;0.001</b> | 57.4      | -8.7                              | <b>&lt;0.001</b> | 57.0      | -8.7                            | <b>&lt;0.001</b> | 57.1      |
| Session                                                           | 3.6                               | <b>&lt;0.001</b> | 62.3      | 3.7                               | <b>&lt;0.001</b> | 60.0      | 3.6                             | <b>&lt;0.001</b> | 60.4      |
| Money [Money]                                                     | 7.8                               | <b>&lt;0.001</b> | 58.0      | 7.8                               | <b>&lt;0.001</b> | 58.1      | 7.8                             | <b>&lt;0.001</b> | 58.0      |
| Stim [taVNS] ×<br>RewMag [High]                                   | -1.2                              | 0.636            | 58.3      | -0.5                              | 0.757            | 58.3      | -0.5                            | 0.757            | 58.3      |
| Stim [taVNS] ×<br>Diff [Hard]                                     | -2.1                              | 0.237            | 57.3      | -2.1                              | 0.104            | 57.3      | -2.1                            | 0.104            | 57.3      |
| RewMag [High] ×<br>Diff [Hard]                                    | 3.5                               | <b>0.026</b>     | 65.9      | 3.4                               | <b>0.003</b>     | 66.0      | 3.4                             | <b>0.003</b>     | 66.0      |
| Stim [taVNS] ×<br>RewMag [High] ×<br>Diff [Hard]                  | -0.3                              | 0.889            | 74.5      | 1.5                               | 0.332            | 73.1      | 1.5                             | 0.331            | 73.4      |
| Group [MDD]                                                       | 3.0                               | 0.519            | 57.0      |                                   |                  |           |                                 |                  |           |
| Stim [taVNS] ×<br>Group [MDD]                                     | -1.0                              | 0.770            | 56.8      |                                   |                  |           |                                 |                  |           |
| RewMag [High] ×<br>Group [MDD]                                    | 2.3                               | 0.572            | 57.1      |                                   |                  |           |                                 |                  |           |
| Diff [Hard] ×<br>Group [MDD]                                      | 1.0                               | 0.749            | 57.0      |                                   |                  |           |                                 |                  |           |
| Stim [taVNS] ×<br>RewMag [High] ×<br>Group [MDD]                  | 1.2                               | 0.719            | 58.3      |                                   |                  |           |                                 |                  |           |
| Stim [taVNS] ×<br>Diff [Hard] ×<br>Group [MDD]                    | 0.1                               | 0.959            | 57.3      |                                   |                  |           |                                 |                  |           |
| RewMag [High] ×<br>Diff [Hard] ×<br>Group [MDD]                   | -0.2                              | 0.917            | 65.8      |                                   |                  |           |                                 |                  |           |
| Stim [taVNS] ×<br>RewMag [High] ×<br>Diff [Hard] ×<br>Group [MDD] | 3.5                               | 0.248            | 74.3      |                                   |                  |           |                                 |                  |           |
| SHAPS                                                             |                                   |                  |           | -0.9                              | 0.675            | 53.7      |                                 |                  |           |



|                                                    |      |       |       |      |
|----------------------------------------------------|------|-------|-------|------|
| Stim [taVNS] × SHAPS                               | 1.4  | 0.408 | 56.8  |      |
| RewMag [High] × SHAPS                              | 0.5  | 0.805 | 57.2  |      |
| Diff [Hard] × SHAPS                                | -0.5 | 0.763 | 57.0  |      |
| Stim [taVNS] × RewMag [High] × SHAPS               | -0.3 | 0.884 | 58.3  |      |
| Stim [taVNS] × Diff [Hard] × SHAPS                 | 0.4  | 0.774 | 57.3  |      |
| RewMag [High] × Diff [Hard] × SHAPS                | -0.3 | 0.784 | 66.0  |      |
| Stim [taVNS] × RewMag [High] × Diff [Hard] × SHAPS | 0.9  | 0.528 | 73.5  |      |
| <hr/>                                              |      |       |       |      |
| BDI                                                |      | 1.1   | 0.616 | 55.8 |
| Stim [taVNS] × BDI                                 |      | -0.9  | 0.602 | 56.9 |
| RewMag [High] × BDI                                |      | 0.5   | 0.790 | 57.1 |
| Diff [Hard] × BDI                                  |      | 1.4   | 0.396 | 57.0 |
| Stim [taVNS] × RewMag [High] × BDI                 |      | 1.0   | 0.561 | 58.3 |
| Stim [taVNS] × Diff [Hard] × BDI                   |      | -0.0  | 0.969 | 57.3 |
| RewMag [High] × Diff [Hard] × BDI                  |      | -0.1  | 0.924 | 66.0 |
| Stim [taVNS] × RewMag [High] × Diff [Hard] × BDI   |      | 1.3   | 0.397 | 73.8 |

**Table S10:** Effort maintenance is not altered by transcutaneous vagus nerve stimulation (taVNS) across both sessions and independent of group. Results from a linear mixed effects models. BDI = Beck's Depression Inventory. SHAPS = Snaith Hamilton pleasure scale

| <i>Predictors</i>                                | <b>Wanting [Group]</b> |                  |           | <b>Wanting [BDI]</b> |                  |           | <b>Wanting [SHAPS]</b> |                  |           |
|--------------------------------------------------|------------------------|------------------|-----------|----------------------|------------------|-----------|------------------------|------------------|-----------|
|                                                  | <i>Estimates</i>       | <i>p</i>         | <i>df</i> | <i>Estimates</i>     | <i>p</i>         | <i>df</i> | <i>Estimates</i>       | <i>p</i>         | <i>df</i> |
| (Intercept)                                      | 49.4                   | <b>&lt;0.001</b> | 89.1      | 45.2                 | <b>&lt;0.001</b> | 87.2      | 45.3                   | <b>&lt;0.001</b> | 87.8      |
| Stim [taVNS]                                     | -0.3                   | 0.910            | 55.6      | -1.3                 | 0.466            | 54.3      | -1.3                   | 0.465            | 54.5      |
| RewMag [High]                                    | 17.6                   | <b>&lt;0.001</b> | 60.3      | 21.0                 | <b>&lt;0.001</b> | 57.2      | 21.0                   | <b>&lt;0.001</b> | 57.4      |
| Diff [Hard]                                      | -7.8                   | <b>0.001</b>     | 57.7      | -7.6                 | <b>&lt;0.001</b> | 57.9      | -7.6                   | <b>&lt;0.001</b> | 57.8      |
| Session                                          | 3.1                    | <b>0.003</b>     | 56.2      | 3.2                  | <b>0.003</b>     | 56.2      | 3.2                    | <b>0.003</b>     | 56.2      |
| Money [Money]                                    | 15.3                   | <b>&lt;0.001</b> | 58.0      | 15.3                 | <b>&lt;0.001</b> | 58.0      | 15.3                   | <b>&lt;0.001</b> | 58.0      |
| Stim [taVNS] ×<br>RewMag [High]                  | -0.8                   | 0.777            | 60.2      | 0.1                  | 0.960            | 59.1      | 0.1                    | 0.960            | 59.1      |
| Stim [taVNS] ×<br>Diff [Hard]                    | 1.0                    | 0.567            | 86.4      | 0.3                  | 0.831            | 115.9     | 0.3                    | 0.833            | 85.3      |
| RewMag [High] ×<br>Diff [Hard]                   | 4.2                    | <b>0.031</b>     | 79.8      | 3.7                  | <b>0.007</b>     | 81.3      | 3.7                    | <b>0.008</b>     | 80.6      |
| Stim [taVNS] ×<br>RewMag [High] ×<br>Diff [Hard] | 0.4                    | 0.865            | 179.8     | 0.8                  | 0.612            | 208.1     | 0.8                    | 0.617            | 166.2     |
| Group [MDD]                                      | -8.0                   | 0.087            | 57.0      |                      |                  |           |                        |                  |           |
| Diff [Hard] ×<br>Group [MDD]                     | 0.4                    | 0.908            | 57.7      |                      |                  |           |                        |                  |           |
| taVNS × MDD                                      | -2.0                   | 0.567            | 54.8      |                      |                  |           |                        |                  |           |
| RewMag [High] ×<br>MDD                           | 6.8                    | 0.131            | 57.3      |                      |                  |           |                        |                  |           |
| taVNS ×<br>RewMag [High] ×<br>MDD]               | 1.8                    | 0.652            | 59.2      |                      |                  |           |                        |                  |           |
| taVNS × Diff<br>[Hard] × MDD                     | -1.5                   | 0.549            | 86.1      |                      |                  |           |                        |                  |           |
| RewMag [High] ×<br>Diff [Hard] ×<br>MDD          | -1.1                   | 0.684            | 79.7      |                      |                  |           |                        |                  |           |
| taVNS× RewMag<br>[High] × Diff<br>[Hard]) × MDD  | 0.8                    | 0.797            | 183.0     |                      |                  |           |                        |                  |           |
| BDI                                              |                        |                  |           | -2.8                 | 0.239            | 57.0      |                        |                  |           |

| <i>Predictors</i>                           | <b>Wanting [Group]</b> |          |           | <b>Wanting [BDI]</b> |          |           | <b>Wanting [SHAPS]</b> |          |           |
|---------------------------------------------|------------------------|----------|-----------|----------------------|----------|-----------|------------------------|----------|-----------|
|                                             | <i>Estimates</i>       | <i>p</i> | <i>df</i> | <i>Estimates</i>     | <i>p</i> | <i>df</i> | <i>Estimates</i>       | <i>p</i> | <i>df</i> |
| taVNS × BDI                                 |                        |          |           | -0.1                 | 0.975    | 54.8      |                        |          |           |
| RewMag [High] × BDI                         |                        |          |           | 4.1                  | 0.068    | 57.3      |                        |          |           |
| Diff [Hard] × BDI                           |                        |          |           | 1.8                  | 0.246    | 57.9      |                        |          |           |
| taVNS × RewMag [High] × BDI                 |                        |          |           | -0.8                 | 0.675    | 59.3      |                        |          |           |
| taVNS × Diff [Hard] × BDI                   |                        |          |           | -2.1                 | 0.080    | 118.8     |                        |          |           |
| RewMag [High] × Diff [Hard] × BDI           |                        |          |           | -1.8                 | 0.171    | 81.7      |                        |          |           |
| taVNS × RewMag[High] × Diff [Hard] × BDI    |                        |          |           | 2.5                  | 0.114    | 232.8     |                        |          |           |
| SHAPS                                       |                        |          |           |                      |          |           | -3.4                   | 0.150    | 57.0      |
| taVNS × SHAPS                               |                        |          |           |                      |          |           | 0.0                    | 0.985    | 54.7      |
| RewMag [High] × SHAPS                       |                        |          |           |                      |          |           | 3.5                    | 0.121    | 57.3      |
| Diff [Hard] × SHAPS                         |                        |          |           |                      |          |           | 2.0                    | 0.183    | 57.8      |
| taVNS × RewMag [High] × SHAPS               |                        |          |           |                      |          |           | -1.2                   | 0.559    | 59.2      |
| taVNS × Diff [Hard] × SHAPS                 |                        |          |           |                      |          |           | -1.4                   | 0.250    | 86.7      |
| RewMag [High] × Diff [Hard] × SHAPS         |                        |          |           |                      |          |           | -1.6                   | 0.240    | 81.1      |
| taVNS × RewMag [High] × Diff [Hard] × SHAPS |                        |          |           |                      |          |           | 0.7                    | 0.663    | 185.9     |

**Table S11:** Wanting is not altered by transcutaneous vagus nerve stimulation (taVNS) across both sessions and independent of group. Results from a linear mixed effects models. BDI = Beck's Depression Inventory. SHAPS = Snaith Hamilton pleasure scale
